# Supplementary material for: ENSO–cave drip water hydrochemical relationship: a 7-year dataset from south-eastern Australia
Source: Copernicus journal article supplement (doi:10.5194/hess-20-4625-2016), 2016-11-17

Supplement of Hydrol. Earth Syst. Sci., 20, 4625–4640, 2016  
<http://www.hydrol-earth-syst-sci.net/20/4625/2016/>  
doi:10.5194/hess-20-4625-2016-supplement  
© Author(s) 2016. CC Attribution 3.0 License.

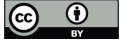

*Supplement of*

## **ENSO–cave drip water hydrochemical relationship: a 7-year dataset from south-eastern Australia**

**Carol V. Tadros et al.**

*Correspondence to:* Carol V. Tadros ([carol.tadros@ansto.gov.au](mailto:carol.tadros@ansto.gov.au))

The copyright of individual parts of the supplement might differ from the CC-BY 3.0 licence.

## Supplementary information

5 **S1.** Photograph of drip site HW2 prior to the removal of stalagmite HW2. Drip rate field measurements of HW2 prior to the removal of the calcite column was 30 seconds/drip (11/06/2006). After removal the drip rate for HW2 slowed to 287.5 seconds/drip (11/11/2006; n=4, range 281-296 seconds) and 25.25 seconds/drip was recorded at the newly formed drip site HW3 (11/11/2006; n=4, range 25-26 seconds). Based on this field evidence, we interpret drip site HW2 is an overflow of site HW3.

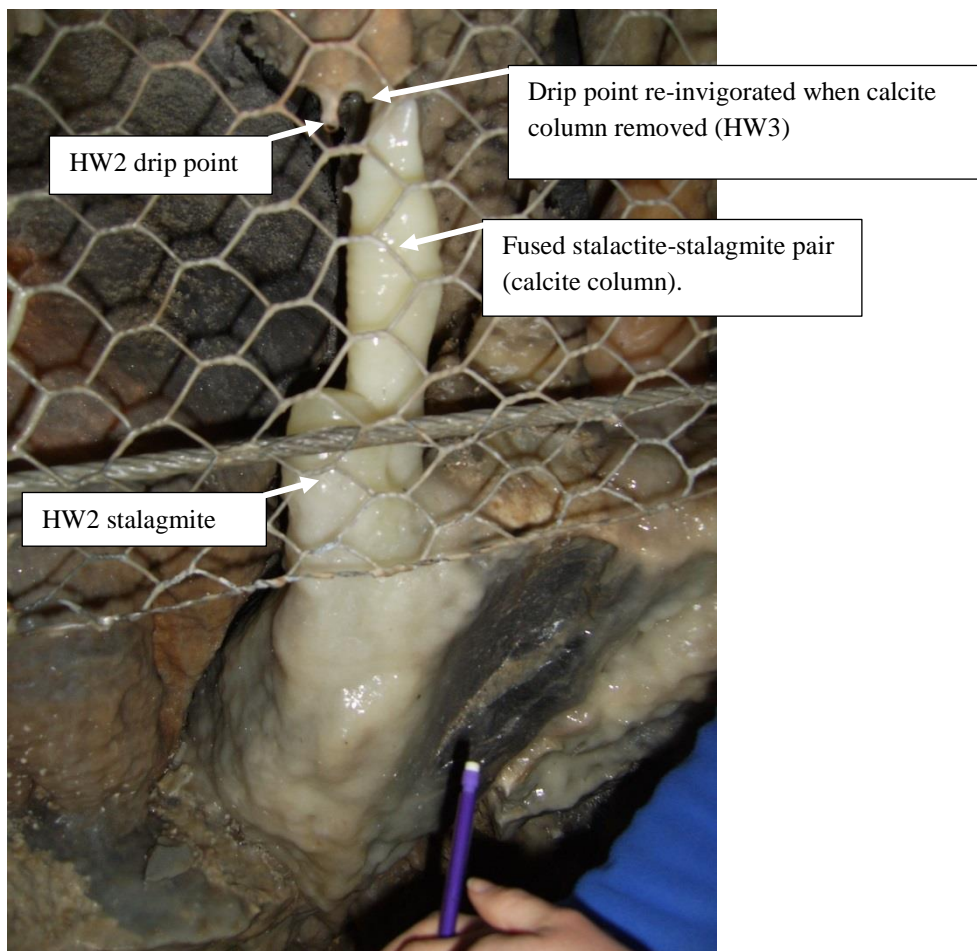

S2. Description of instrumentation employed and data recorded including resolution, range and accuracy where available.

| Parameter                                              | Resolution | Range                                  | Accuracy ±                                                                                 |
|--------------------------------------------------------|------------|----------------------------------------|--------------------------------------------------------------------------------------------|
| <b>Davis Vantage Pro2™ Weather Station</b>             |            |                                        |                                                                                            |
| BARROMETRIC PRESSURE                                   |            |                                        |                                                                                            |
| Barometric Pressure (Elevation range: -600 to +4570 m) | 0.1 mb     | 540 to 1100 mb or hPa                  | 1,0 mb or hPa                                                                              |
| HUMIDITY                                               |            |                                        |                                                                                            |
| Inside humidity                                        | 1%         | 1% to 100%                             | 3%                                                                                         |
| Outside humidity                                       | 1%         | 1% to 100%                             | 3%                                                                                         |
| RAINFALL                                               |            |                                        |                                                                                            |
| Rainfall                                               | 0.2 mm     | 0 to 6553 mm                           | 4%                                                                                         |
| Rate of rainfall                                       | 0.1 mm/hr  | 0 to 2438 mm/hr                        | 5% ≤ 127 mm/hr                                                                             |
| TEMPERATURE                                            |            |                                        |                                                                                            |
| Inside temperature                                     | 0.1°C      | 0° to +60°C                            | 0.5°C                                                                                      |
| Outside temperature                                    | 0.1°C      | -40° to +65°C                          | 0.5°C                                                                                      |
| WIND                                                   |            |                                        |                                                                                            |
| Wind direction                                         | 1°         | 0° to 360°                             | 3°                                                                                         |
| Wind speed                                             | 1 km/hr    | 1 to 320 km/hr                         | 5%                                                                                         |
| <b>Stevens Hydra Probe® Soil Sensor</b>                |            |                                        |                                                                                            |
| Temperature                                            | -          | -10° to +55°C                          | 0.6°C                                                                                      |
| Soil moisture wfv                                      | -          | From completely dry to fully saturated | 0.01 (for most soils)<br>0.03 m <sup>3</sup> m <sup>-3</sup> (max for fine textured soils) |
| Electrical Conductivity                                | -          | 0.01 to 1.5 S/m                        | ± 2.0% or 0.005 S/m whichever is typically greater                                         |
| Dielectric constant                                    | -          | 1 to 80                                | ± 1.5% or 0.2 whichever is typically greater                                               |
| <b>Vaisala GMP343 Carbon dioxide probe</b>             |            |                                        |                                                                                            |
| Soil CO <sub>2</sub>                                   | -          | 0 – 2 %                                | 10 ppm CO <sub>2</sub>                                                                     |

S3. Dripwater ln(Sr/Ca) vs. ln(Mg/Ca) ratios at site HW1 and HW3 are graphed together with the bedrock ratios.

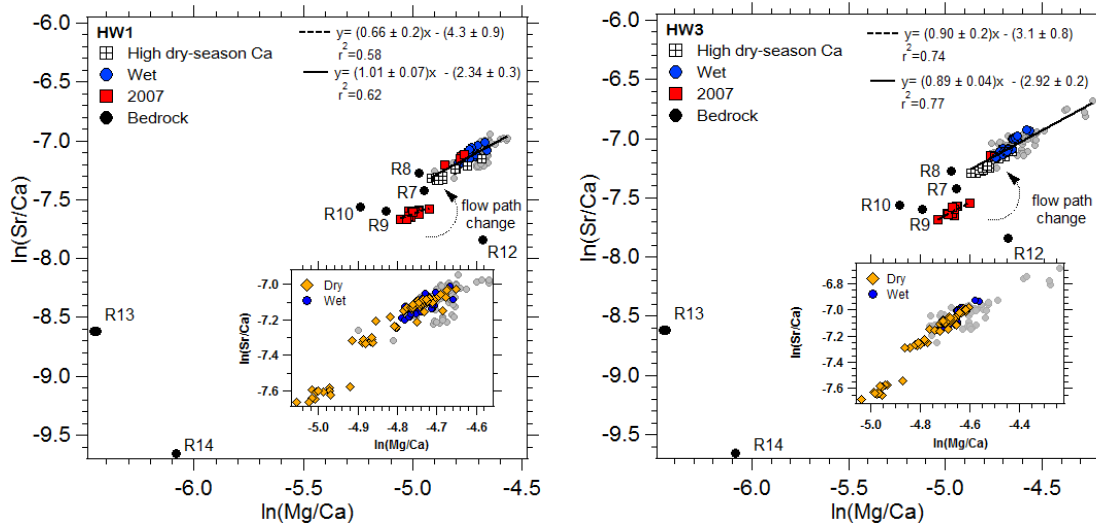

Supplement: Supplementary file 1 [file hess-20-4625-2016-supplement.pdf]
